# Supplementary material
Source: PubMed Central journal article supplement (PMC3346455)
Supplement: supp_78.9.3286_AEM00007-12-s01.pdf [file supp_78.9.3286_AEM00007-12-s01.pdf]

1

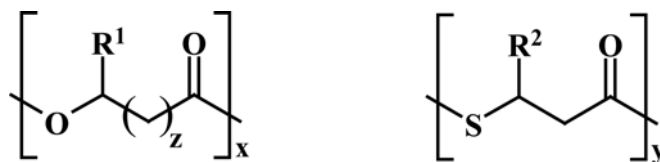

2

3

4

5

6

Figure S1. Comparison of the chemical structures of PHA and PTE

7

R<sup>1</sup>, alkyl group (C<sub>n</sub>H<sub>2n+1</sub>) or functionalized alkyl group; z, 1 to 4 -CH<sub>2</sub>-; R<sup>2</sup>, hydrogen,

8

methyl or ethyl group.

9

10

11

12

13

14

15

16

17

18

19

20

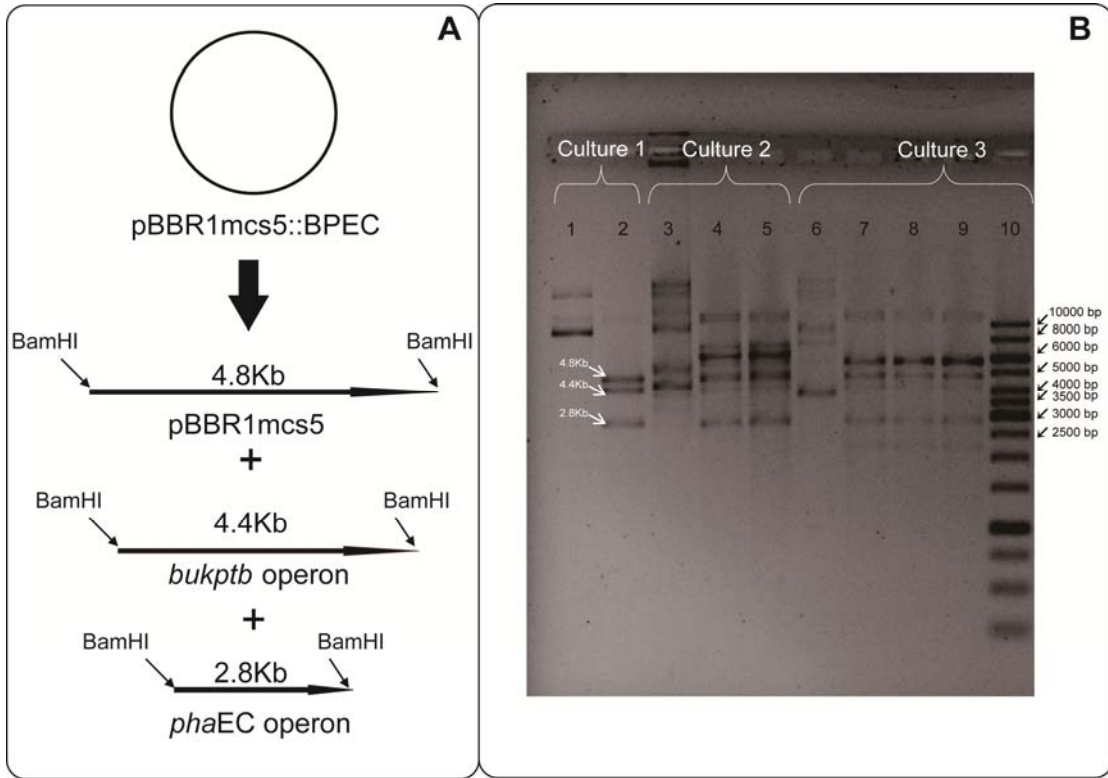

21

22

23 Figure S2. Plasmid structural instability in strain SHX1

24 A) *Bam*HI cut pBBR1MCS5::BPEC consists of 4.8-kb pBBR1MCS5, 4.4-kb *bukptb*  
 25 operon and 2.8-kb *phaEC* operon as indicated in the figure with arrows.

26 B) All plasmids were extracted from *A. mimigardefordensis* pBBR1MCS5::BPEC  
 27 cultivated in MSM containing 0.5% (wt/vol) gluconate. Lanes 1, 3, and 6 show plasmid  
 28 pBBR1MCS5::BPEC in a 1% (wt/vol) agarose gel. Lanes 2, 4, 5, 7, 8, and 9 show the  
 29 fragments obtained from the same plasmid after restriction with *Bam*HI. Lanes 1 and 2  
 30 are the normal sized plasmids without a structural rearrangement (compare Fig. S2A).

31 Plasmid was extracted after 4 h of cultivation. Lanes 3 to 9 represent plasmids extracted  
 32 from the same culture, but after an incubation time of 12 h. This demonstrates the

33 instability of plasmids with structural rearrangement. Lane 10 shows the molecular  
34 weight marker for agarose gel electrophoresis (GeneRuler™ 1-kb DNA Ladder).

35 Relevant fragment sizes are indicated.

36

37

38

39

40

41

42

43

44

45

46

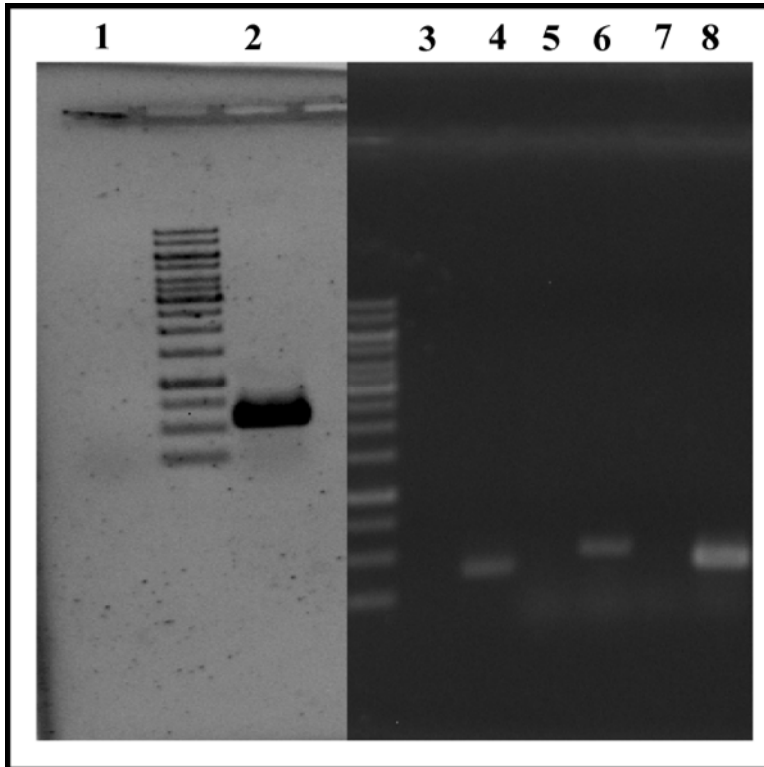

47

48

49 Figure S3. Results of RT-PCR

50 RT-PCR was carried out with RNA isolated from *A. mimigardefordensis* SHX5. Four  
51 samples of their relevant genes in BPEC pathway gave positive signals by using a  
52 RT-PCR kit (Qiagen). The samples in lanes 2, 4, 6, and 8 show the PCR signals of *ptb*,  
53 *phaE*, *buk* and *phaC*, respectively. Samples in lanes 1, 3, 5, and 7 were DNA  
54 contamination controls of the samples separated in lanes 2, 4, 6, and 8, respectively.

55

56

57

58

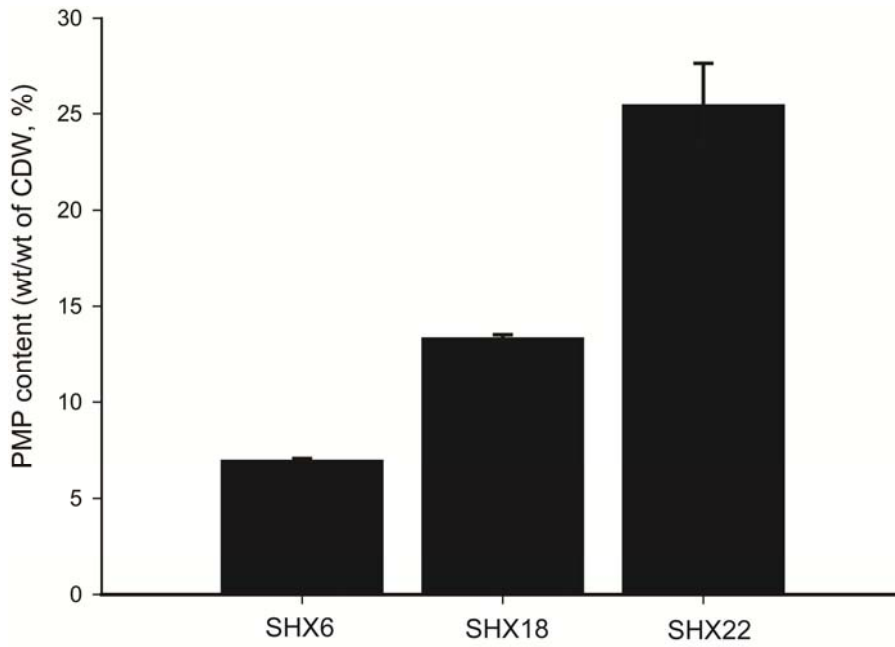

59

60

61 Figure S4. Comparison of PMP production in three different strains cultivated under

62 the same conditions

63

64

65

66

67

68

69

70

71

72

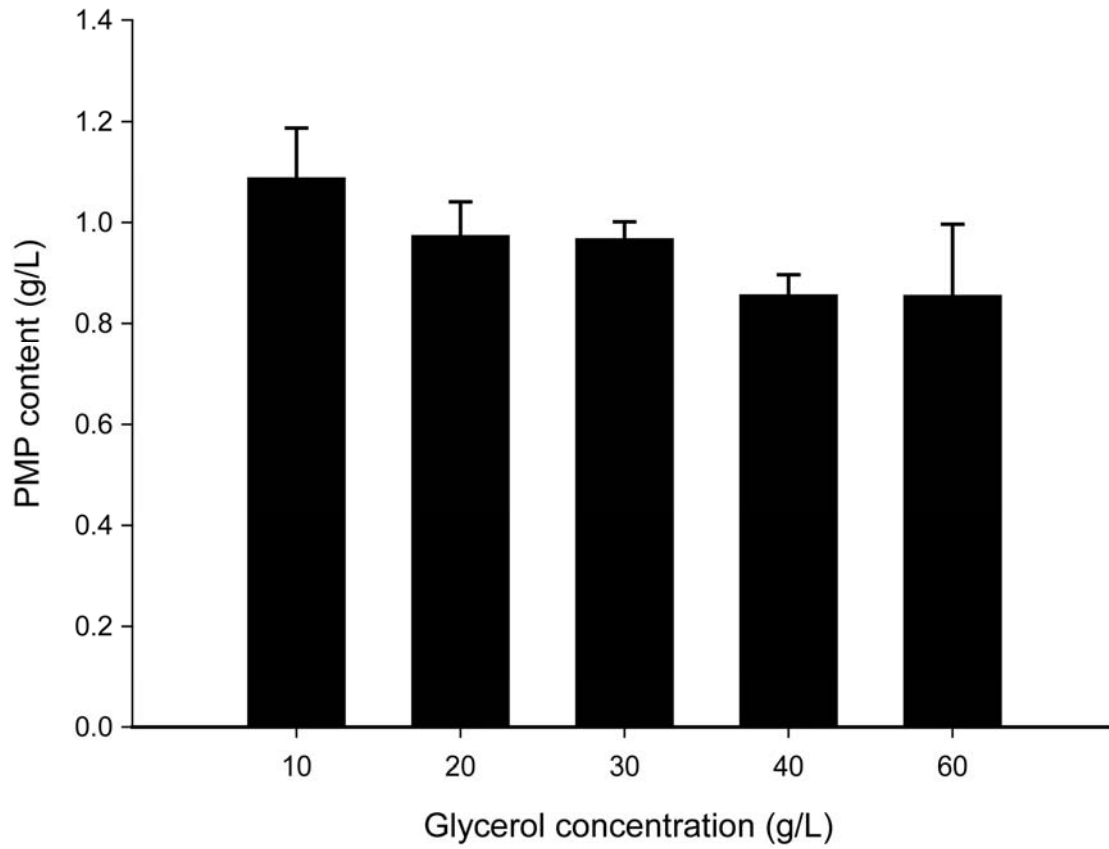

73

74

75 Figure S5. Final PMP concentrations after cultivation of strain SHX22 in mineral salts

76 medium containing different glycerol concentrations

77

78

79

80

81

82

83

84 TABLE S1. Primer used in this study

| Oligonucleotides | Sequence                          | Purpose                                                                |
|------------------|-----------------------------------|------------------------------------------------------------------------|
| M13 forward      | GTAAAACGACGGCCAGT                 | Common primers for sequencing                                          |
| M13 reverse      | CAGGAAACAGCTATGAC                 | Common primers for sequencing                                          |
| bukptb_Fr_EcoRI  | GAATTCAGCGGCTGTGGATGGAGTT         | Forward primer for insertion of <i>bukptb</i> operon into pBBR1MCS5    |
| bukptb_Rev_EcoRI | GAATTCGGTGCAAATATTGGCATGTGG       | Reverse primer for insertion of <i>bukptb</i> operon into pBBR1MCS5    |
| recA_UFR_Fr      | GGATCCACCAATCACTTCGTCTGC          | Forward primer to clone the upstream flank of <i>recA</i>              |
| recA_UFR_Rev     | GAATTCGGAGGGTCCTTGTGACTG          | Reverse primer to clone the upstream flank of <i>recA</i>              |
| recA_DFR_Fr      | GAATCTTTTTCCCAAGGGCAGGGCAGC       | Forward primer to clone the downstream flank of <i>recA</i>            |
| recA_DFR_Rev     | GGATCCCCGAGCGTTATGGCGTTCAGTG      | Reverse primer to clone the downstream flank of <i>recA</i>            |
| recA_IN_Fr       | GGACGACAAGCAATCCAAAG              | Forward internal sequencing primer to verify deletion of <i>recA</i>   |
| recA_IN_Rev      | TCACTCATCCGCTTCCGTAG              | Reverse internal sequencing primer to verify deletion of <i>recA</i>   |
| recA_OUT_Fr      | GGCAAGAAGCCATTCCGGTC              | Forward external sequencing primer to verify deletion of <i>recA</i>   |
| recA_OUT_Rev     | TGGGATAACGCCAGCACAC               | Reverse external sequencing primer to verify deletion of <i>recA</i>   |
| mdo_UFR_Fr       | CAACGGAGAGAAATACTGGATCAC          | Forward primer to clone the upstream flank of <i>mdo</i>               |
| mdo_UFR_Rev      | AAAAAAGAATTCAATATGCTCCTTTGGTGTCG  | Reverse primer to clone the upstream flank of <i>mdo</i>               |
| mdo_DFR_Fr       | AAGAATTCGACCGTTCCTATTGCTACATTCCAC | Forward primer to clone the downstream flank of <i>mdo</i>             |
| mdo_DFR_Rev      | GCCGGTTCCTGCACCGTTAC              | Reverse primer to clone the downstream flank of <i>mdo</i>             |
| phaC_UFR_Fr      | GGATCCATAACGGCAAATCGCTGGGTC       | Forward primer to clone the upstream flank of <i>phaC<sub>Am</sub></i> |
| phaC_UFR_Rev     | GAATTCCTGTGGCACTCTCACCGTATAA      | Reverse primer to clone the upstream flank of <i>phaC<sub>Am</sub></i> |

|                   |                                     |                                                                                   |
|-------------------|-------------------------------------|-----------------------------------------------------------------------------------|
| phaC_DFR_Fr       | GAATTCTCAGGCCAATACATCGTTT           | Forward primer to clone the downstream flank of <i>phaC<sub>Am</sub></i>          |
| phaC_DFR_Rev      | GGATCCAGATAGGAACCCATCACGC           | Reverse primer to clone the downstream flank of <i>phaC<sub>Am</sub></i>          |
| phaC_inFr_Check   | ATGAGCATTAGACAACAGTCGGAG            | Forward internal sequencing primer to verify deletion of <i>phaC<sub>Am</sub></i> |
| phaC_inRev_Check  | TCAGGCTTTAACTTTCACATAGTGC           | Reverse internal sequencing primer to verify deletion of <i>phaC<sub>Am</sub></i> |
| phaC_frount_check | GAGCGCCTGGCTTTTGGTTATATAG           | Forward external sequencing primer to verify deletion of <i>phaC<sub>Am</sub></i> |
| phaC_revout_check | TGCGGGATTGAACGGGAAC                 | Reverse external sequencing primer to verify deletion of <i>phaC<sub>Am</sub></i> |
| phaE_180_Fr_RT    | ACCTGGTTCGCGACTTCATG                | Forward primer of <i>phaE</i> probe using in RT-PCR                               |
| phaE_580_Rv_RT    | AGCCGTTGTATTCGTTCAAGG               | Reverse primer of <i>phaE</i> probe using in RT-PCR                               |
| phaC_325_Fr_RT    | CGTCTATCTGATCGACTGGG                | Forward primer of <i>phaC</i> probe using in RT-PCR                               |
| phaC_774_Rv_RT    | GATGAACTGGCGGAAGGTC                 | Reverse primer of <i>phaC</i> probe using in RT-PCR                               |
| ptb_30_Fr_RT      | CATGAAGGTAAAGAGCAAAG                | Forward primer of <i>ptb</i> probe using in RT-PCR                                |
| ptb_390_Rev_RT    | CTATCAGATGTCTCAGTTTC                | Reverse primer of <i>ptb</i> probe using in RT-PCR                                |
| buk_35_Fr_RT      | ATAATCAATCCTGGCTCGAC                | Forward primer of <i>buk</i> probe using in RT-PCR                                |
| buk_550_Rv_RT     | CTACTGAAGTACCTCCACC                 | Reverse primer of <i>buk</i> probe using in RT-PCR                                |
| phaCam_operon_Fr  | GCTAAAGCTTACCAGCGATGACGGTGTTAAAC    | Forward primer for insertion <i>phaC<sub>Am</sub></i> into pBBR1MCS5              |
| phaCam_operon_Rev | AATGAAGCTTGAAGCTTCTTAGGCTACTTTCACGG | Reverse primer for insertion <i>phaC<sub>Am</sub></i> into pBBR1MCS5              |
| phaCre_operon_Fr  | AATCGGATCCC GCCATGCCATACATCAGGAAG   | Forward primer for insertion <i>phaC<sub>Re</sub></i> into pBBR1MCS5              |
| phaCre_operon_Rev | GATCGGATCCCTTTCAATGGAAACGGGAGGGAAC  | Reverse primer for insertion <i>phaC<sub>Re</sub></i> into pBBR1MCS5              |

85

86

87



88 Table S2. PMP and PHB production of strains SHX1 and SHX2 in the modified two

89 stage cultivation method

90

| Culture conditions | Strains | Polymer content          |                          |                          |
|--------------------|---------|--------------------------|--------------------------|--------------------------|
|                    |         | 3HB<br>(wt/wt of CDW, %) | 3HV<br>(wt/wt of CDW, %) | 3MP<br>(wt/wt of CDW, %) |
| Limited nitrogen   | SHX1    | 14.2                     | 3.4                      | below detection limit    |
|                    | SHX2    | 12.1                     | 2.2                      | below detection limit    |
| Normal nitrogen    | SHX1    | below detection limit    | below detection limit    | 1.7                      |
|                    | SHX2    | 3.5                      | below detection limit    | below detection limit    |

91

92 limited nitrogen condition: MS medium containing 0.5 g/L NH<sub>4</sub>Cl

93 normal nitrogen condition: MS medium containing 1 g/L NH<sub>4</sub>Cl

94
